# Supplementary material for: Correction: Retinal nerve fiber layer thickness predicts CSF amyloid/tau before cognitive decline
Source: PubMed Central journal article supplement (PMC7360049; doi:10.1371/journal.pone.0236379), 2020-07-14

**AD OCT Scatter Plots for OD: CH-NAT vs CH-PAT**

**RNFL**

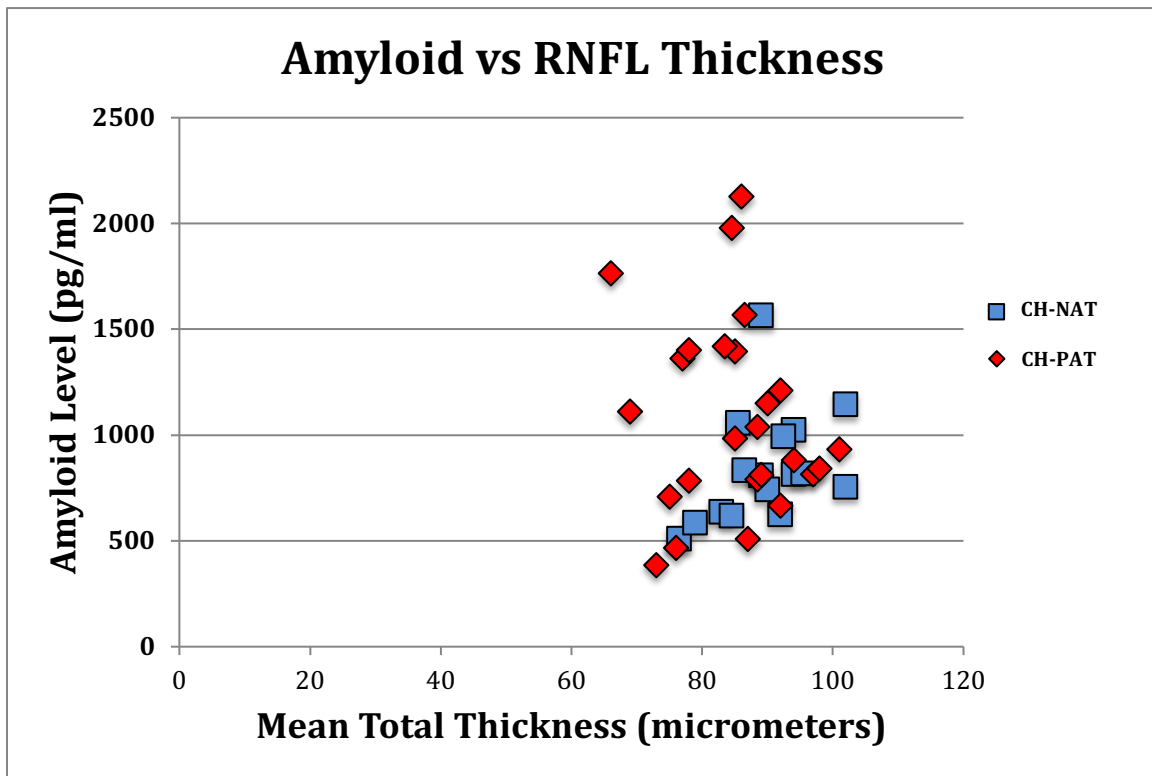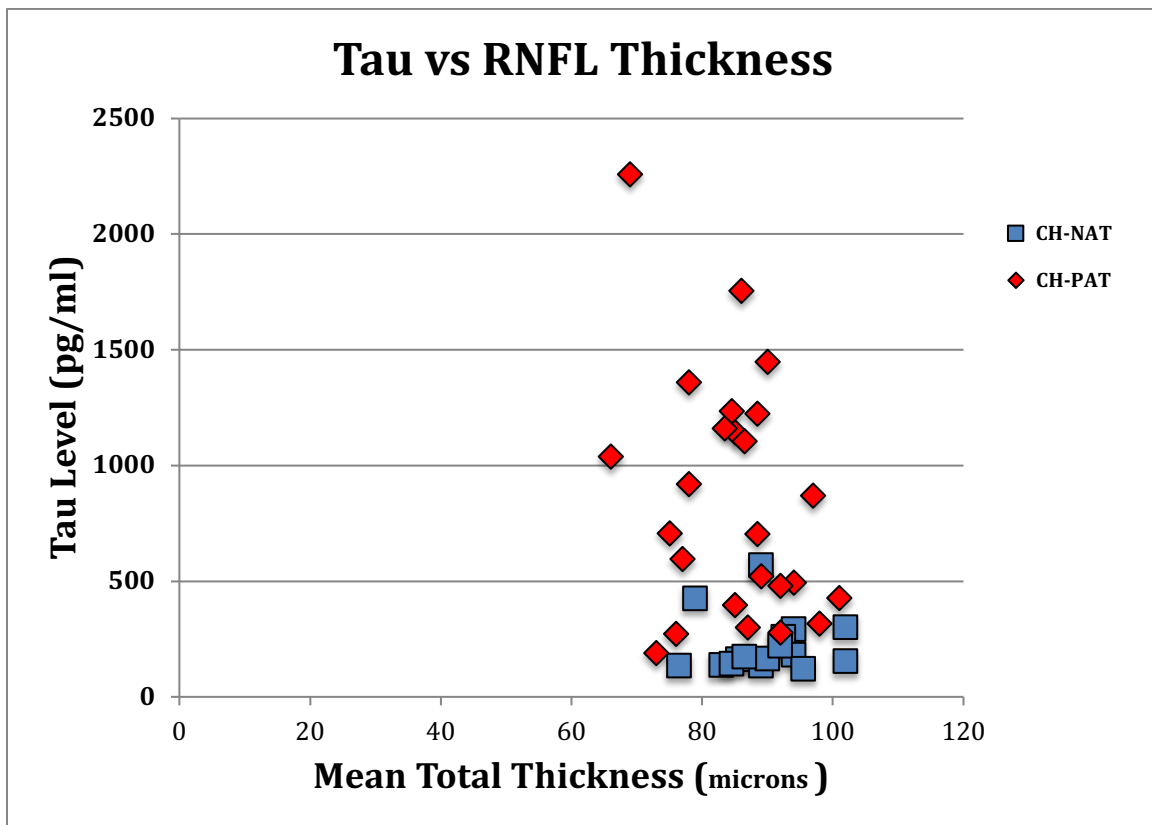

### A/T vs RNFL Thickness

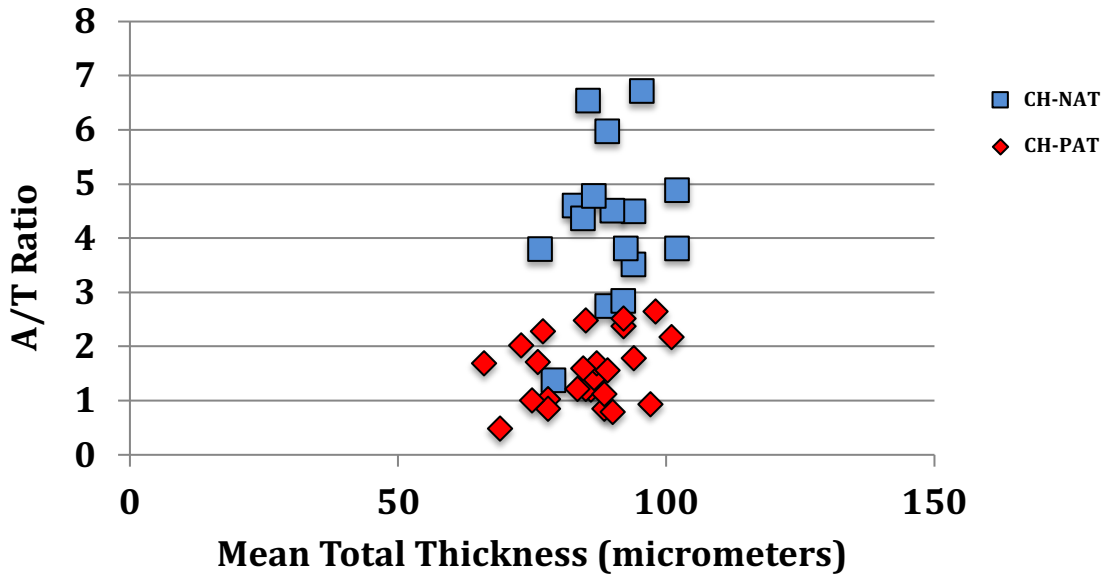

GCC

### Amyloid vs GCC Thickness

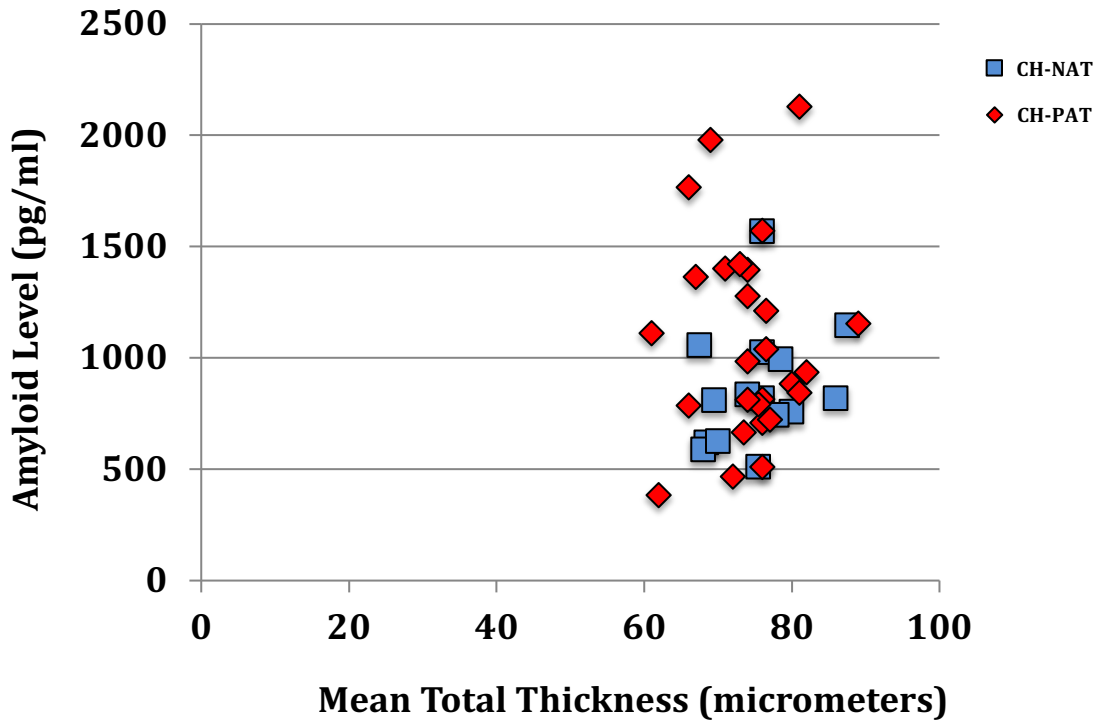

### Tau vs GCC Thickness

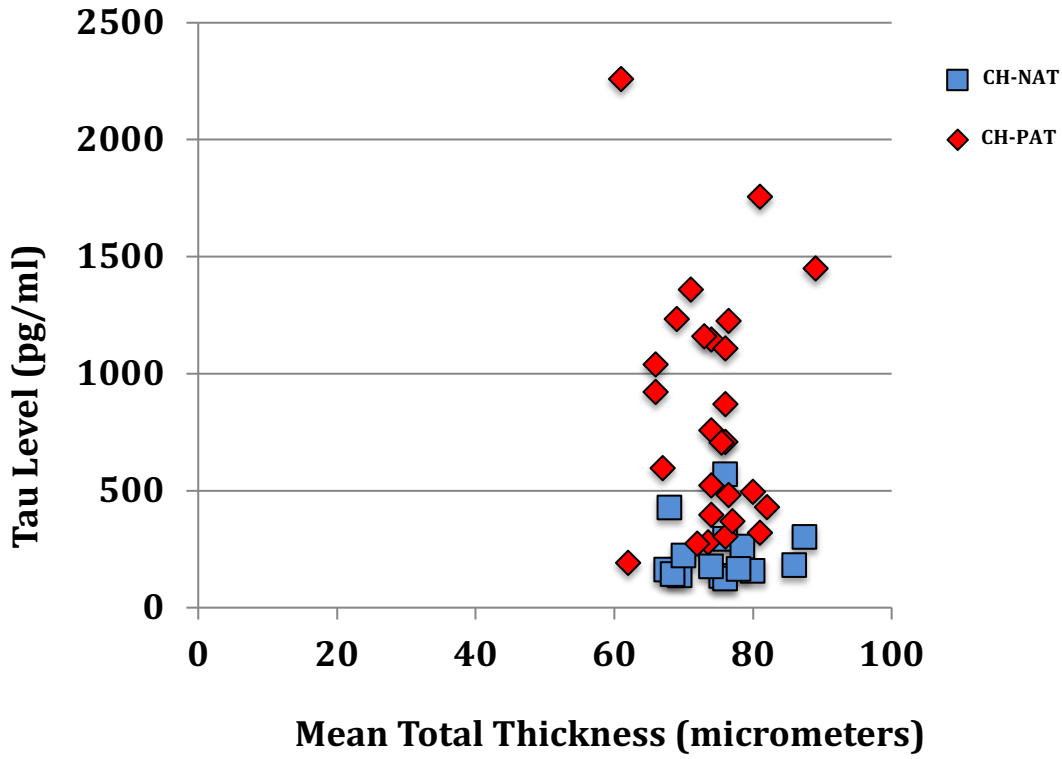

### A/T vs GCC Thickness

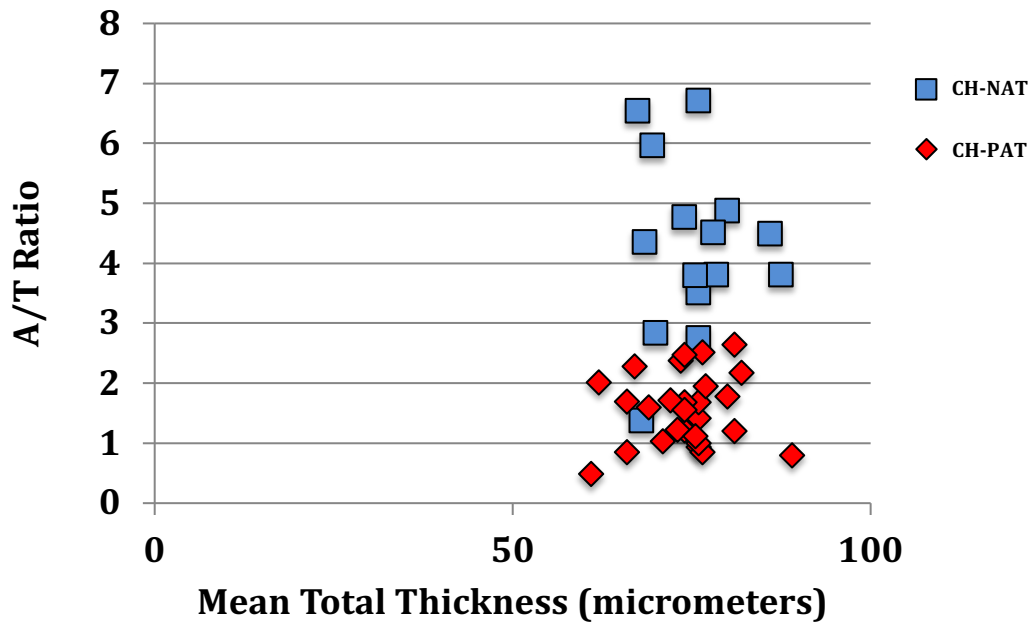

Macula

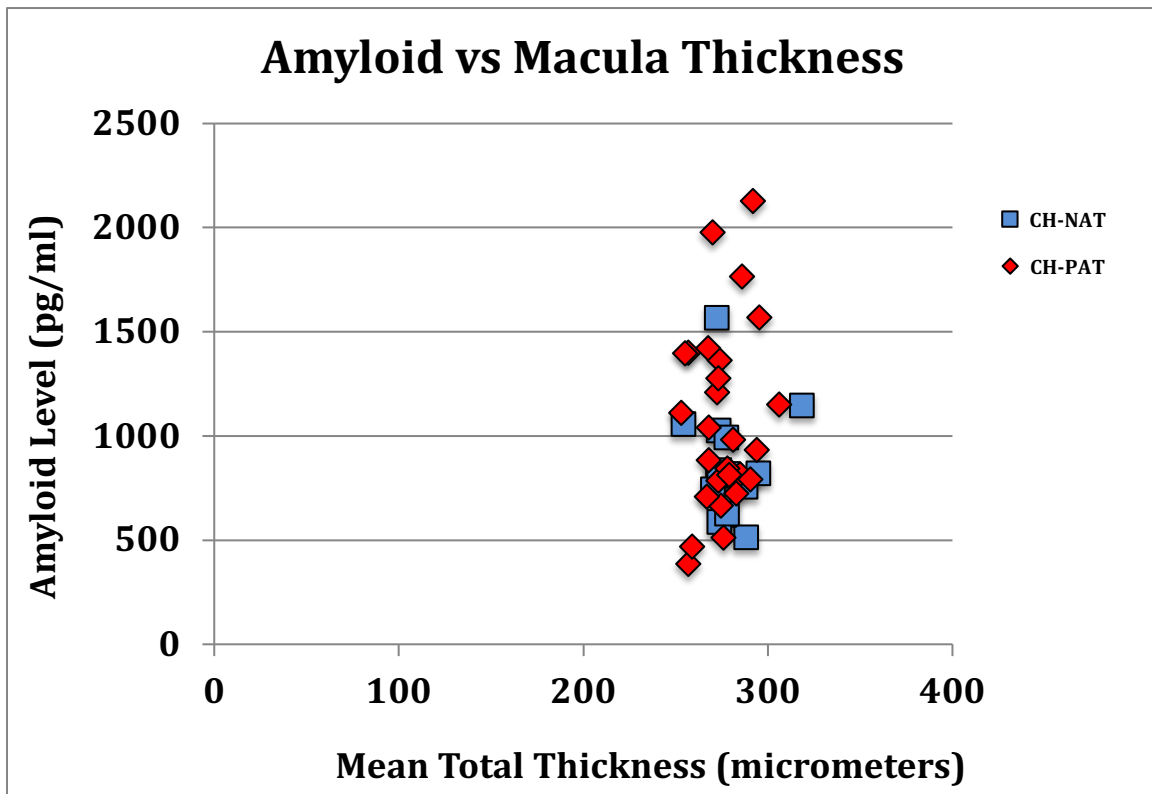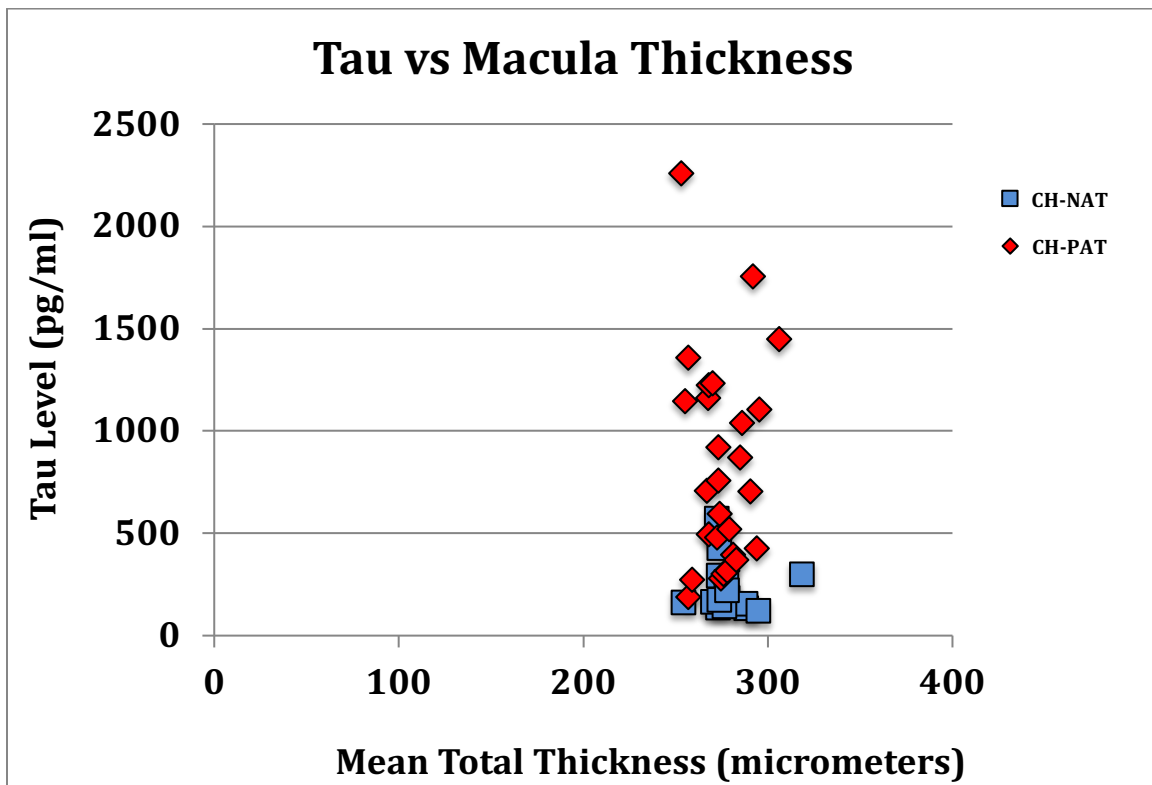

# A/T vs Macula Thickness

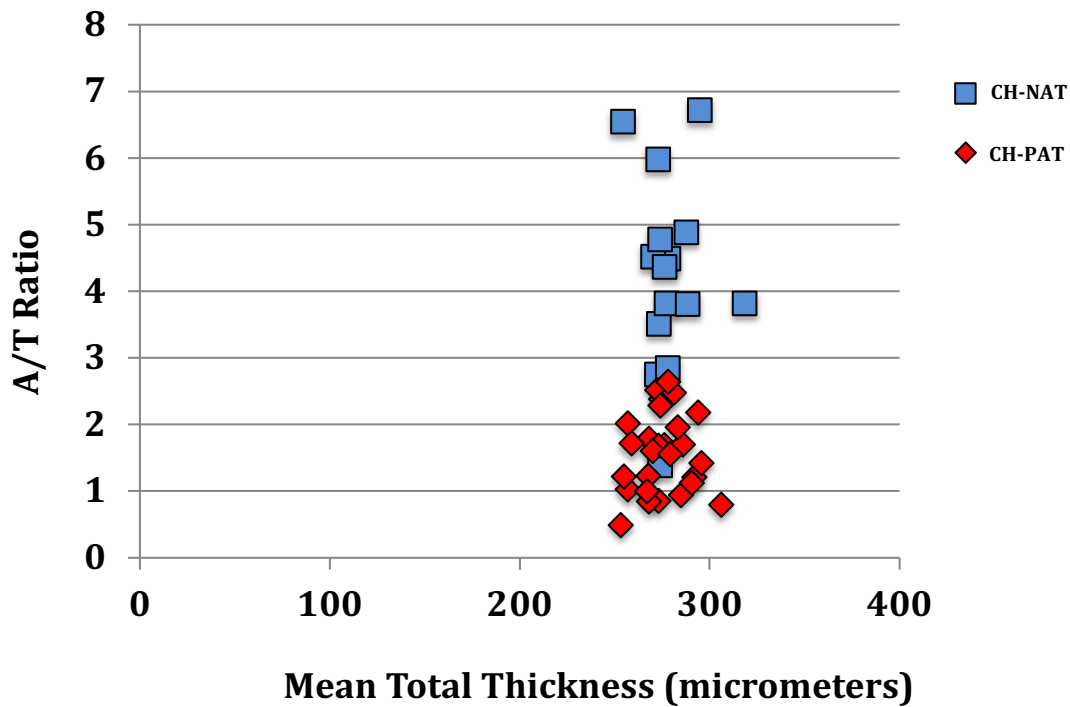

Supplement: pone.0236379.s001.pdf [file pone.0236379.s001.pdf]
